# Supplementary material
Source: PubMed Central journal article supplement (PMC4873435)
Supplement: NIHMS757962-supplement-1.pdf [file NIHMS757962-supplement-1.pdf]

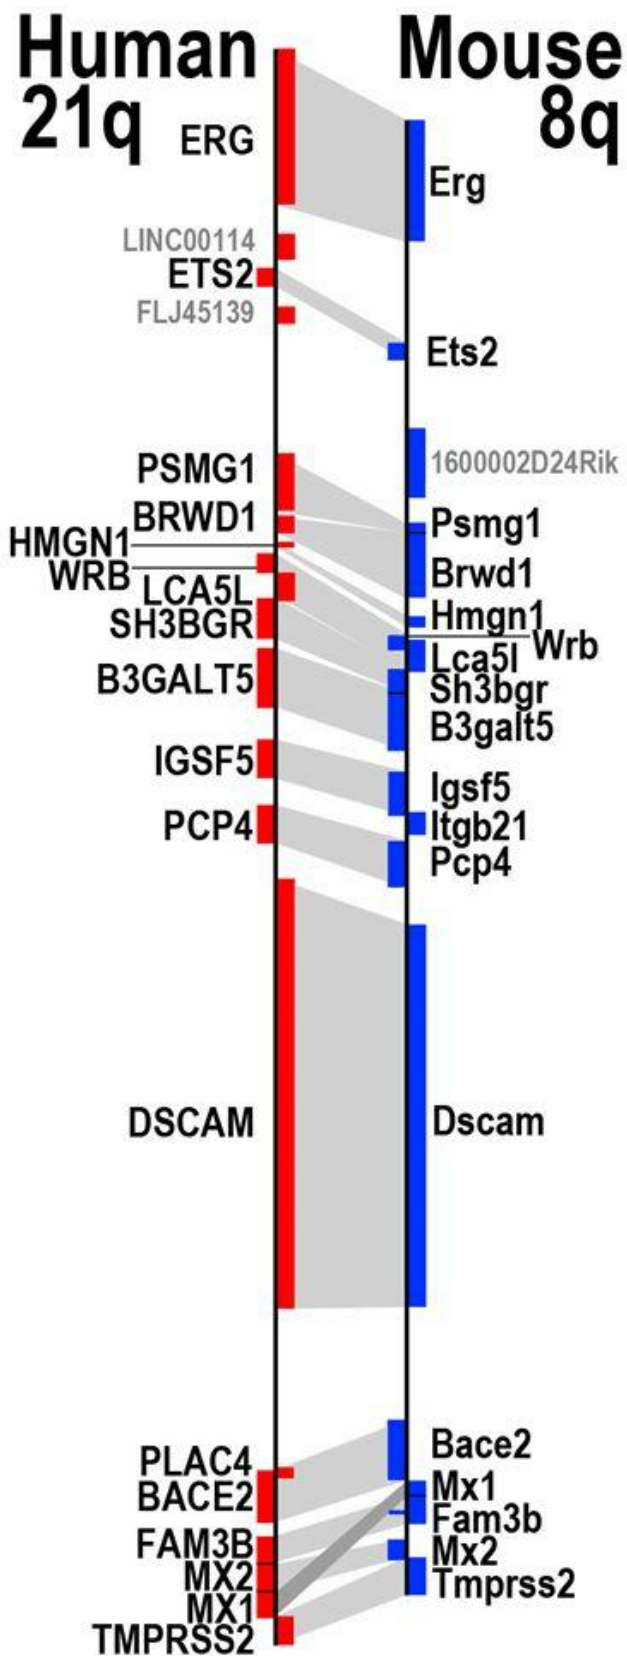

Figure S1

**A**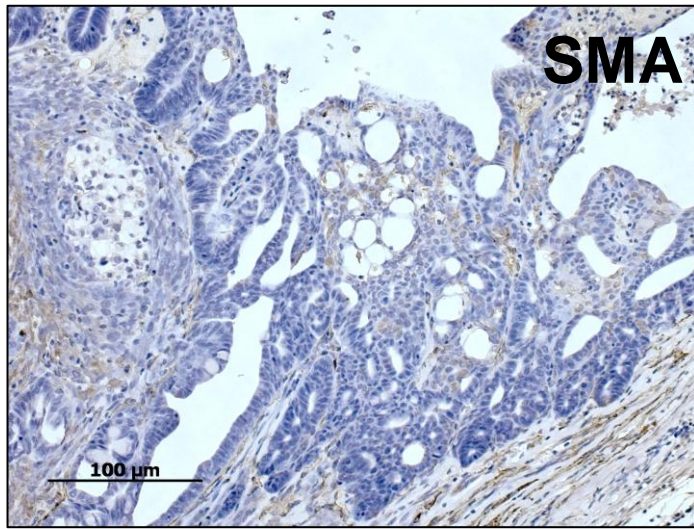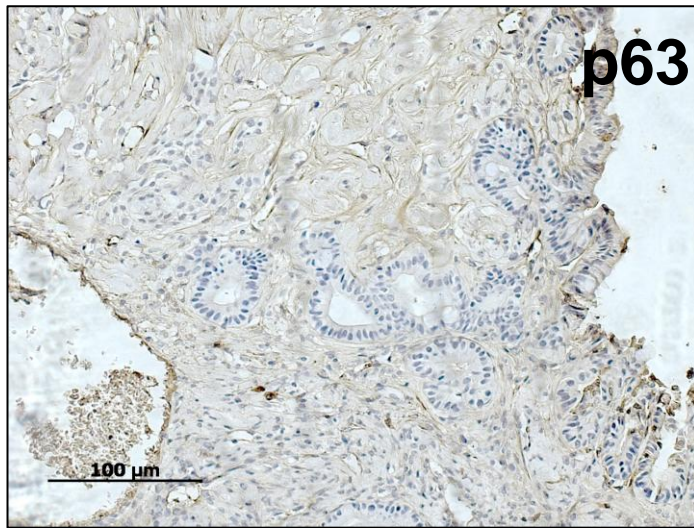**B**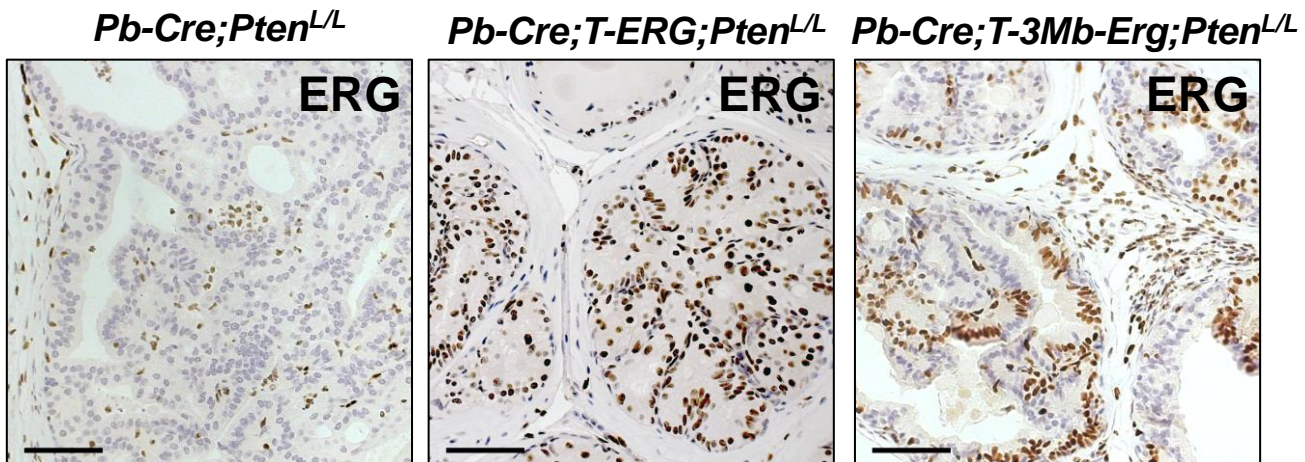

Figure S2



***Pb-Cre;T-3Mb-Erg;Pten<sup>L/L</sup>***

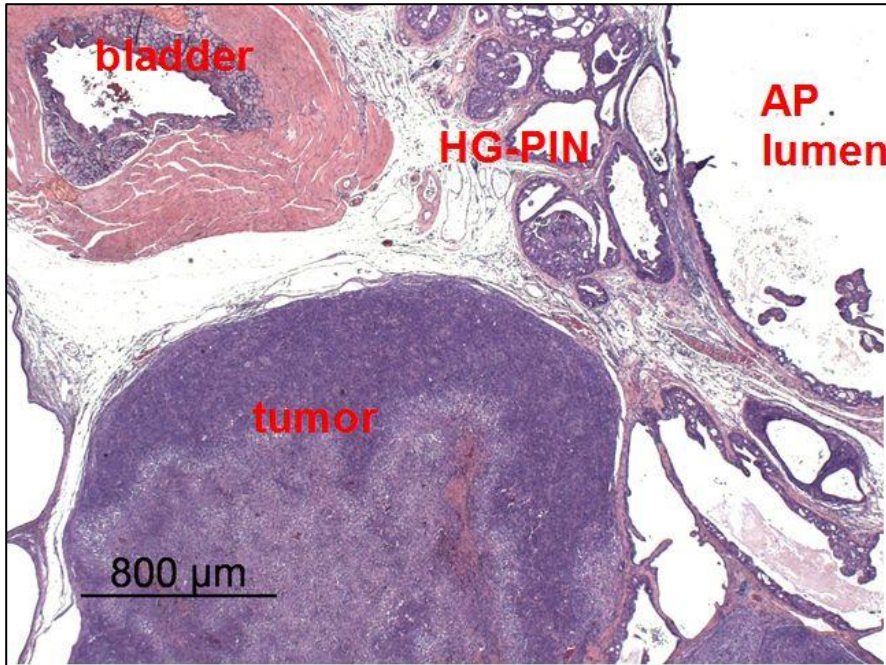

***Pb-Cre;Pten<sup>L/L</sup>***

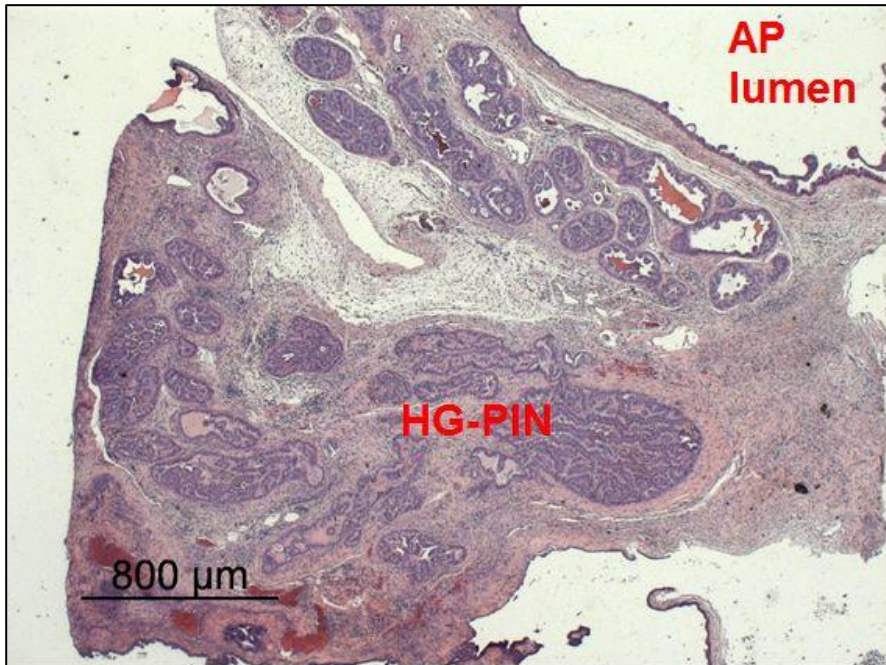

**A*****T-3Mb-Erg***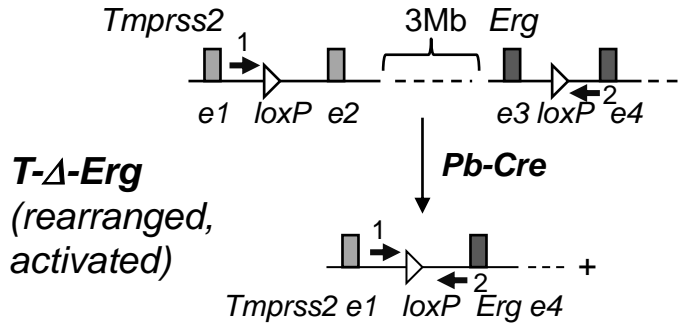**B**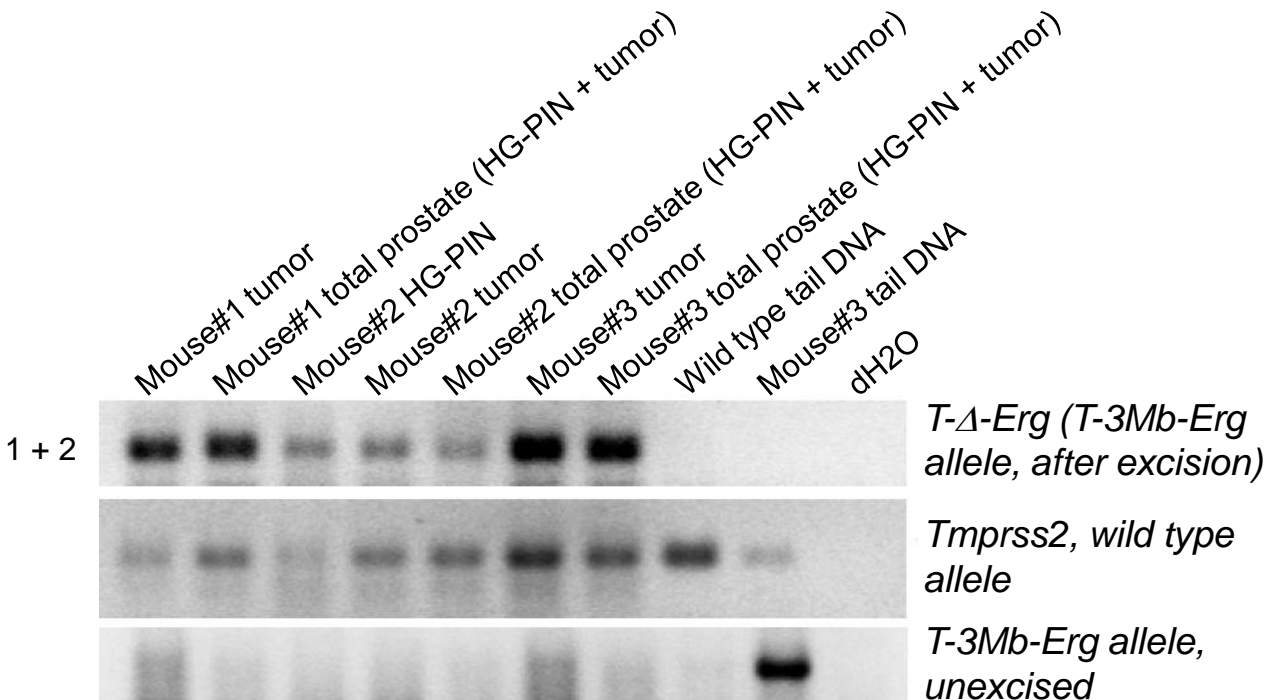

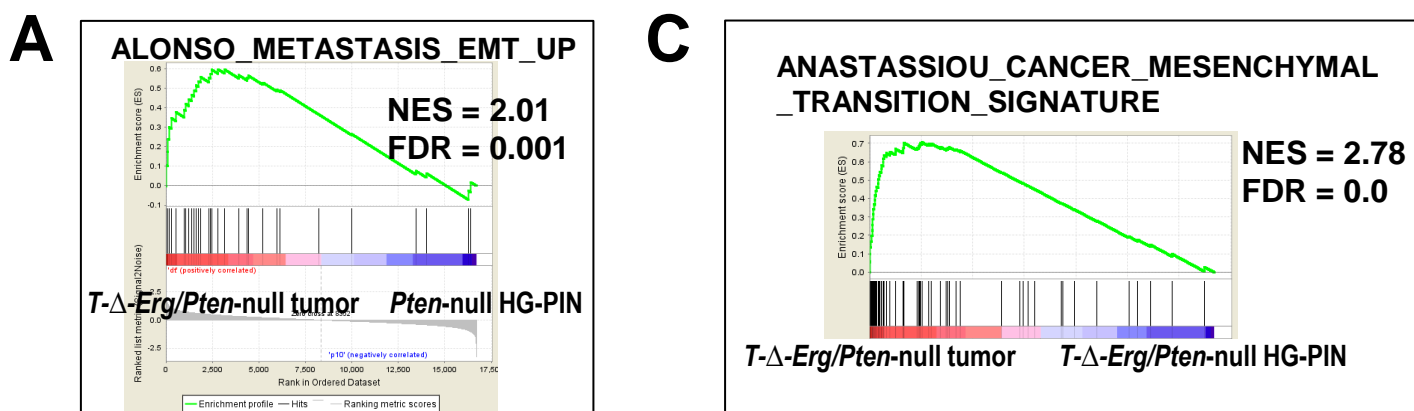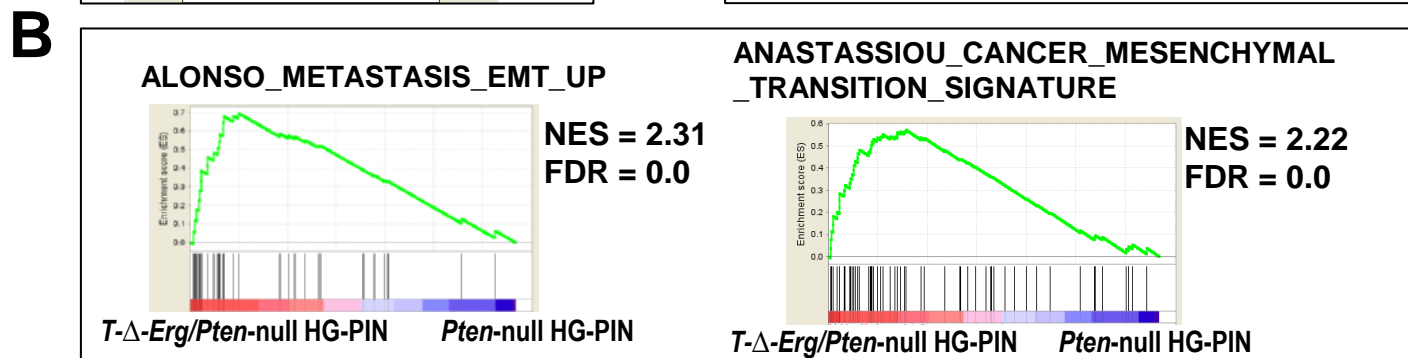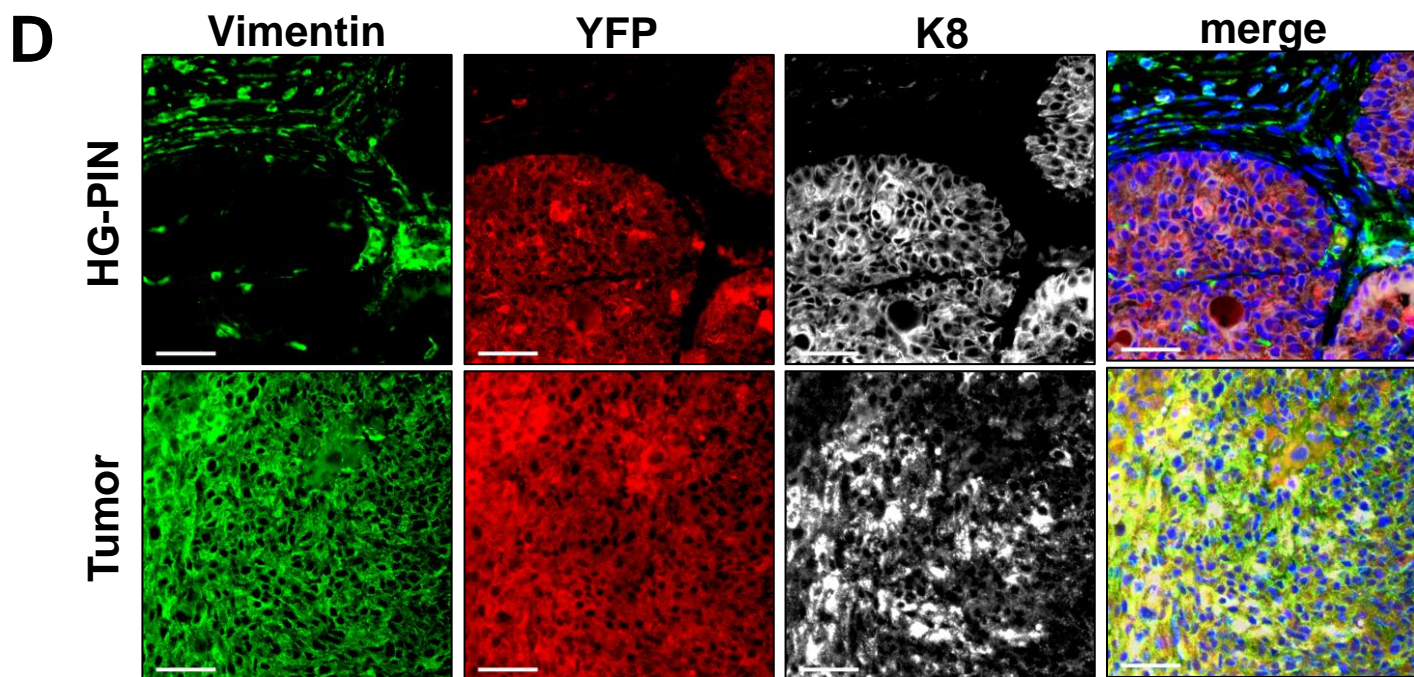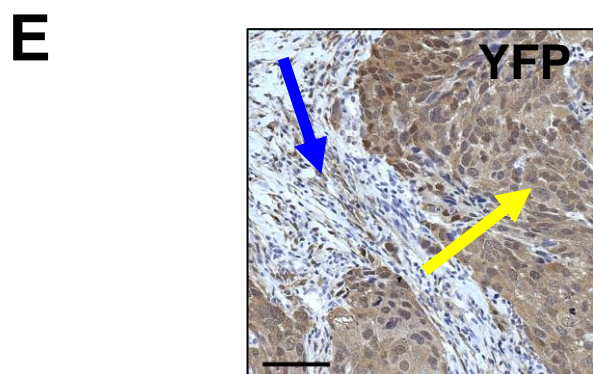

Figure S5



**A**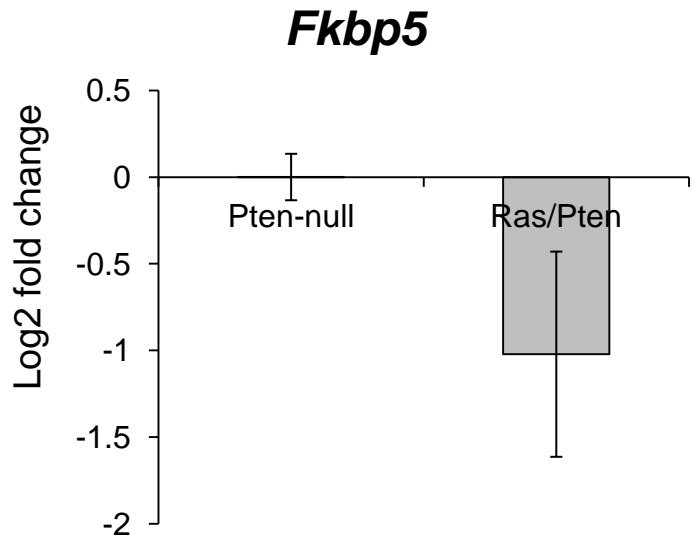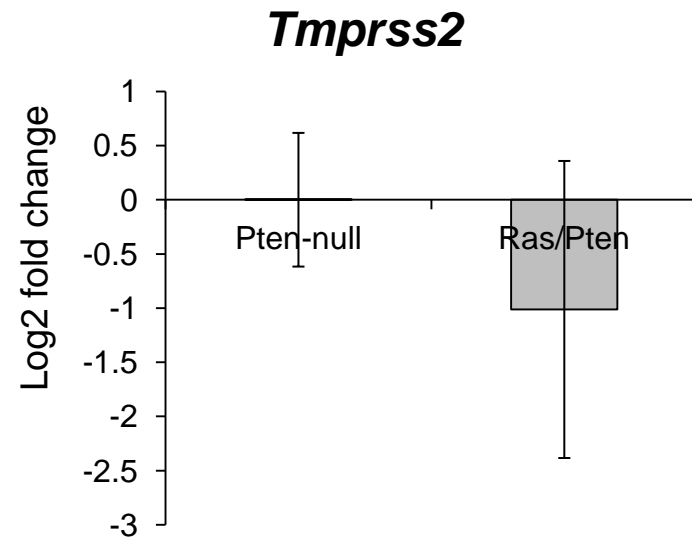**B**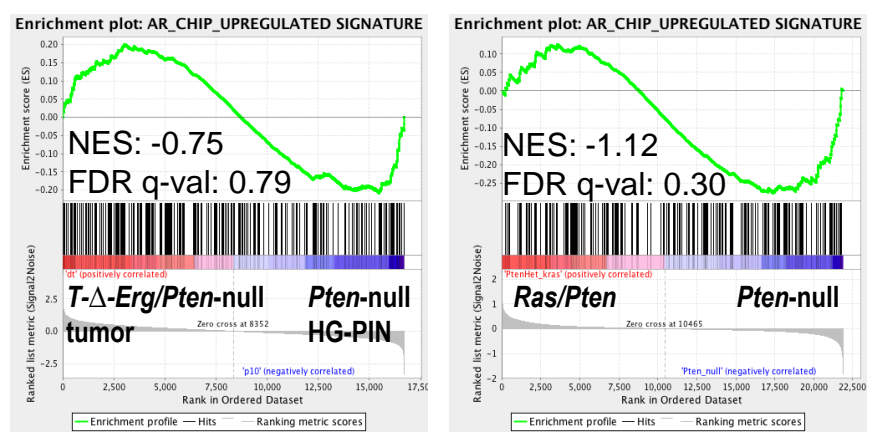**C**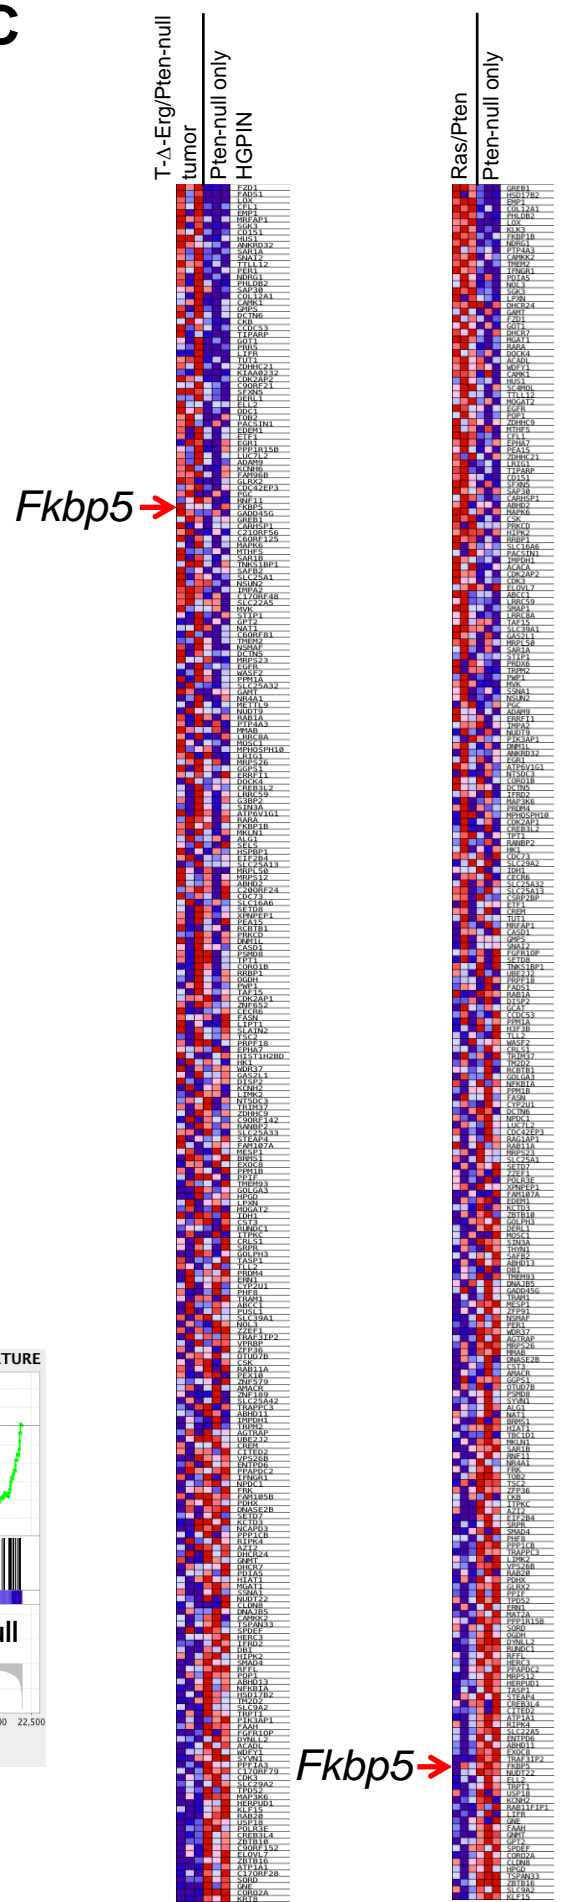**Figure S6**

**A**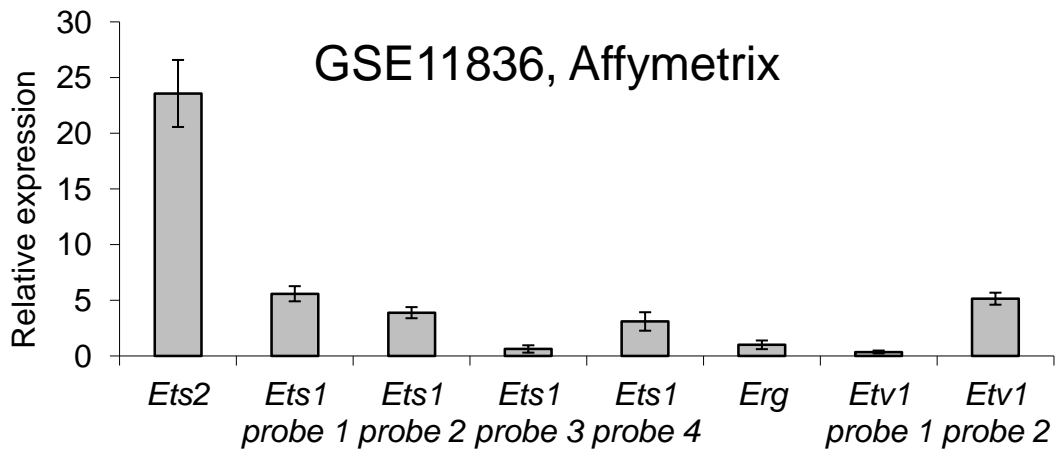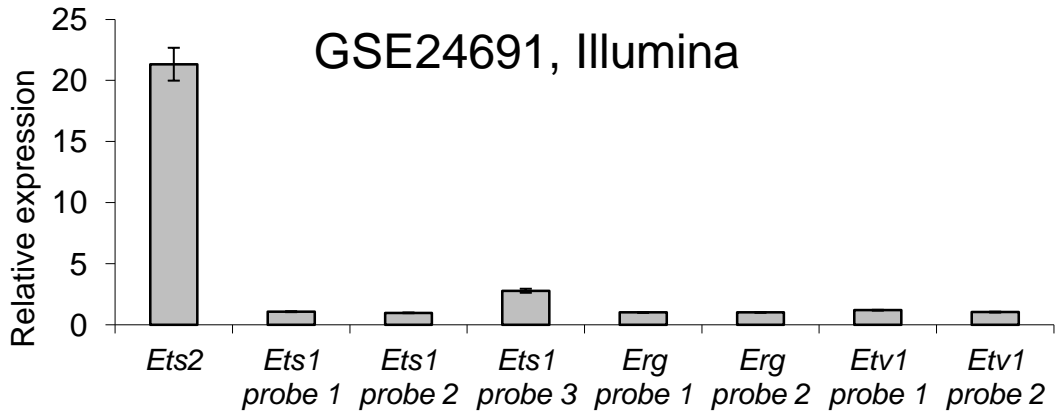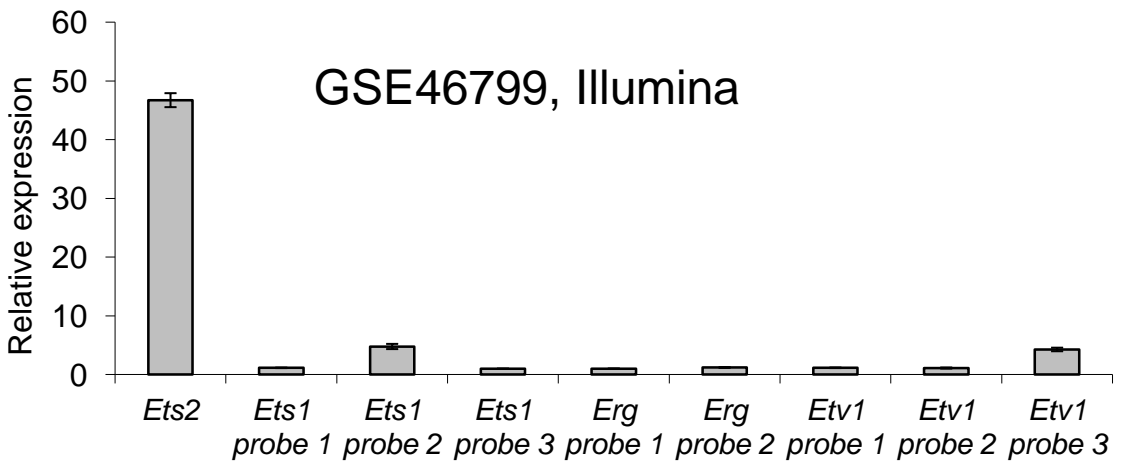**B**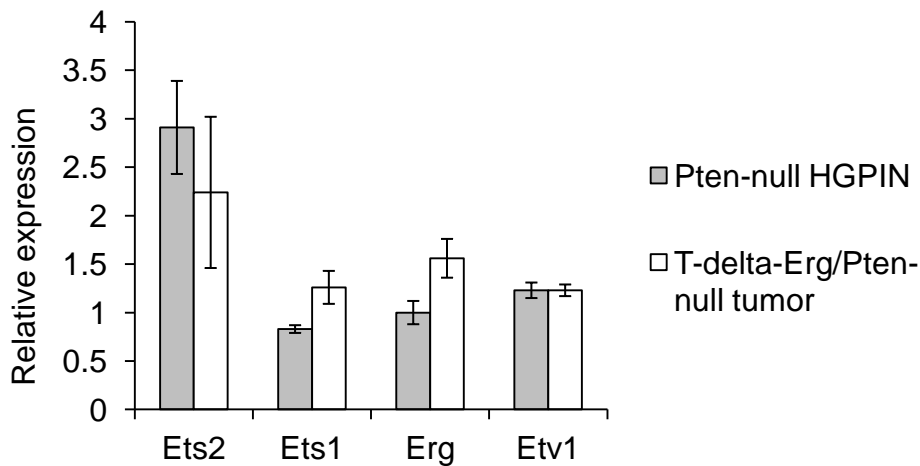**Figure S7**

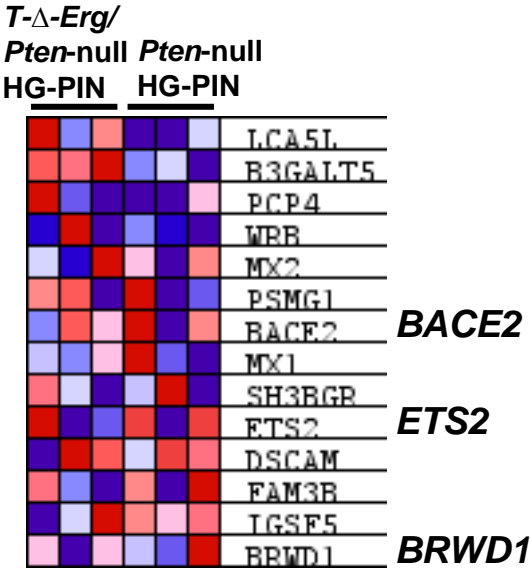

Figure S8
